# Supplementary material for: Interaction between the assembly of the ribosomal subunits: Disruption of 40S ribosomal assembly causes accumulation of extra-ribosomal 60S ribosomal protein uL18/L5
Source: PubMed Central journal article supplement (PMC6984702; doi:10.1371/journal.pone.0222479), 2020-01-27
Supplement: pone.0222479.s003.pdf [file pone.0222479.s003.pdf]

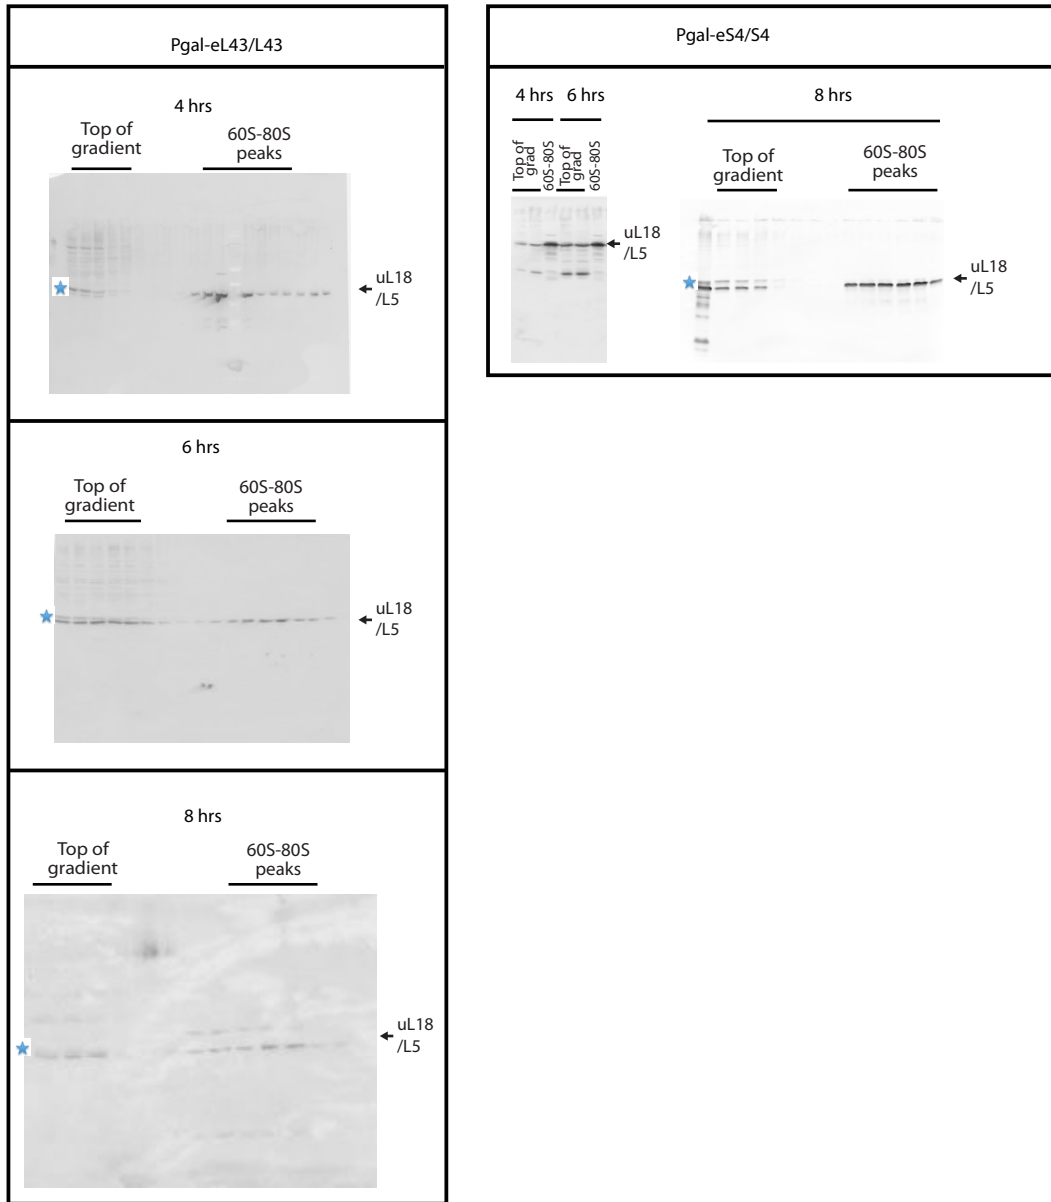

Uncropped Westerns for Fig 4
